# Supplementary material for: Unilateral tests of lower-limb function as prognostic indicators of future knee-related outcomes following anterior cruciate ligament injury: a systematic review and meta-analysis of 13 150 adolescents and adults
Source: HighWire-hosted journal article supplement (doi:10.1136/bjsports-2022-105736), 2023-01-20
Supplement: bjsports-2022-105736supp001_data_supplement.pdf [file bjsports-2022-105736supp001_data_supplement.pdf]

## Appendix 1.

## Systematic search strategy

|                       |                                                                                                                                                                                                                                                                                                                                                                                                                                                                                                                                                                                                                                                                                                                                                                                                     |
|-----------------------|-----------------------------------------------------------------------------------------------------------------------------------------------------------------------------------------------------------------------------------------------------------------------------------------------------------------------------------------------------------------------------------------------------------------------------------------------------------------------------------------------------------------------------------------------------------------------------------------------------------------------------------------------------------------------------------------------------------------------------------------------------------------------------------------------------|
| <b>MEDLINE</b>        | Anterior Cruciate Ligament [MeSH] OR Anterior Cruciate Ligament Injuries [Mesh] OR Anterior Cruciate Ligament Reconstruction [Mesh] OR "anterior cruciate ligament" [mp] ACL [mp]<br><b>AND</b><br>Leg adj4 function* [mp] OR leg adj4 performance [mp] OR "lower extremity" adj4 function* [mp] OR "lower extremity" adj4 performance [mp] OR "lower-extremity" adj4 function* [mp] OR "lower-extremity" adj4 performance [mp] OR "lower limb" adj4 function* [mp] OR "lower limb" adj4 performance [mp] OR "lower-limb" adj4 function* [mp] OR "lower-limb" adj4 performance [mp] OR hop* [mp] OR squat* [mp] OR "one-leg rise" [mp] OR "one leg rise" [mp] OR "single leg rise" [mp] OR jump* [mp] OR "knee bend" [mp] OR battery [mp] OR stair* [mp]                                            |
| <b>Embase</b>         | Anterior Cruciate Ligament [MeSH] OR Anterior Cruciate Ligament Injury [Mesh] OR Anterior Cruciate Ligament Reconstruction [MeSH] OR Anterior Cruciate Ligament Rupture [MeSH] OR "anterior cruciate ligament" [mp] ACL [mp]<br><b>AND</b><br>Leg adj4 function* [mp] OR leg adj4 performance [mp] OR "lower extremity" adj4 function* [mp] OR "lower extremity" adj4 performance [mp] OR "lower-extremity" adj4 function* [mp] OR "lower-extremity" adj4 performance [mp] OR "lower limb" adj4 function* [mp] OR "lower limb" adj4 performance [mp] OR "lower-limb" adj4 function* [mp] OR "lower-limb" adj4 performance [mp] OR hop* [mp] OR squat* [mp] OR "one-leg rise" [mp] OR "one leg rise" [mp] OR "single leg rise" [mp] OR jump* [mp] OR "knee bend" [mp] OR battery [mp] OR stair* [mp] |
| <b>CINAHL</b>         | Anterior Cruciate Ligament Injuries [MeSH] OR Anterior Cruciate Ligament Reconstruction [MeSH] OR ACL [tiab] OR "anterior cruciate ligament" [tiab]<br><b>AND</b><br>Leg n4 function* [tiab] OR leg n4 performance [tiab] OR "lower extremity" n4 function* [tiab] OR "lower extremity" n4 performance [tiab] OR "lower-extremity" n4 function* [tiab] OR "lower-extremity" n4 performance [tiab] OR "lower limb" n4 function* [tiab] OR "lower limb" n4 performance [tiab] OR "lower-limb" n4 function* [tiab] OR "lower-limb" n4 performance [tiab] OR hop* [tiab] OR squat* [tiab] OR "one-leg rise" [tiab] OR "one leg rise" [tiab] OR "single leg rise" [tiab] OR jump* [tiab] OR "knee bend*" [tiab] OR battery [tiab] OR stair* [tiab]                                                       |
| <b>Scopus</b>         | ACL [tiab] OR "anterior cruciate ligament" [tiab]<br><b>AND</b>                                                                                                                                                                                                                                                                                                                                                                                                                                                                                                                                                                                                                                                                                                                                     |
| <b>Web of Science</b> | Leg W/4 function* [tiab] OR leg W/4 performance [tiab] OR "lower extremity" W/4 function* [tiab] OR "lower extremity" W/4 performance [tiab] OR "lower-extremity" W/4 function* [tiab] OR "lower-extremity" W/4 performance [tiab] OR "lower limb" W/4 function* [tiab] OR "lower limb" W/4 performance [tiab] OR "lower-limb" W/4 function* [tiab] OR "lower-limb" W/4 performance [tiab] OR hop* [tiab] OR squat* [tiab] OR "one-leg rise" [tiab] OR "one leg rise" [tiab] OR "single leg rise" [tiab] OR jump* [tiab] OR "knee bend*" [tiab] OR battery [tiab] OR stair* [tiab]                                                                                                                                                                                                                  |
| <b>SPORTDiscus</b>    |                                                                                                                                                                                                                                                                                                                                                                                                                                                                                                                                                                                                                                                                                                                                                                                                     |
