# Supplementary material for: Unilateral tests of lower-limb function as prognostic indicators of future knee-related outcomes following anterior cruciate ligament injury: a systematic review and meta-analysis of 13 150 adolescents and adults
Source: HighWire-hosted journal article supplement (doi:10.1136/bjsports-2022-105736), 2023-01-20
Supplement: bjsports-2022-105736supp004_data_supplement.pdf [file bjsports-2022-105736supp004_data_supplement.pdf]

**Appendix 4.** Tests used in each study

| Study                                         | Single-forward hop (n=42) | Repeated forward hops |                      |                      | Side hop (n=5) | One leg rise (n=4) | Vertical or square hop (n=2) | Battery of tests (n=15) |
|-----------------------------------------------|---------------------------|-----------------------|----------------------|----------------------|----------------|--------------------|------------------------------|-------------------------|
|                                               |                           | Triple hop (n=18)     | Crossover hop (n=23) | 6-m timed hop (n=15) |                |                    |                              |                         |
| <b>Return to Sport</b>                        |                           |                       |                      |                      |                |                    |                              |                         |
| Ardern et al, 2015                            |                           |                       |                      |                      |                |                    |                              |                         |
| Ebert et al, 2019                             |                           |                       |                      |                      |                |                    |                              |                         |
| Faleide et al, 2019                           |                           |                       |                      |                      |                |                    |                              |                         |
| Kitaguchi et al, 2020                         |                           |                       |                      |                      |                |                    |                              |                         |
| McGrath et al, 2017                           |                           |                       |                      |                      |                |                    |                              |                         |
| Moksnes et al, 2009                           |                           |                       |                      |                      |                |                    |                              |                         |
| Nawasreh et al, 2017                          |                           |                       |                      |                      |                |                    |                              |                         |
| Toole et al, 2017                             |                           |                       |                      |                      |                |                    |                              |                         |
| Webster et al, 2019                           |                           |                       |                      |                      |                |                    |                              |                         |
| Welling et al, 2020                           |                           |                       |                      |                      |                |                    |                              |                         |
| <b>Patient-reported symptoms and function</b> |                           |                       |                      |                      |                |                    |                              |                         |
| Cristiani et al, 2020                         |                           |                       |                      |                      |                |                    |                              |                         |
| Culvenor et al, 2016                          |                           |                       |                      |                      |                |                    |                              |                         |
| Ericsson et al, 2013                          |                           |                       |                      |                      |                |                    |                              |                         |
| Filbay et al, 2021                            |                           |                       |                      |                      |                |                    |                              |                         |
| Logerstedt et al, 2012                        |                           |                       |                      |                      |                |                    |                              |                         |
| Mansson et al, 2013                           |                           |                       |                      |                      |                |                    |                              |                         |

|                                          |  |  |  |  |  |  |  |  |
|------------------------------------------|--|--|--|--|--|--|--|--|
| Oiestad et al, 2012                      |  |  |  |  |  |  |  |  |
| Stropnik et al, 2020                     |  |  |  |  |  |  |  |  |
| <b>Success with ACL deficiency</b>       |  |  |  |  |  |  |  |  |
| Button et al, 2006                       |  |  |  |  |  |  |  |  |
| Eitzen et al, 2010                       |  |  |  |  |  |  |  |  |
| Ekas et al, 2019                         |  |  |  |  |  |  |  |  |
| Fitzgerald et al, 2000                   |  |  |  |  |  |  |  |  |
| Grindem et al, 2018                      |  |  |  |  |  |  |  |  |
| <b>Subsequent knee injury after ACLR</b> |  |  |  |  |  |  |  |  |
| Beischer et al, 2020                     |  |  |  |  |  |  |  |  |
| Cristiani et al, 2021                    |  |  |  |  |  |  |  |  |
| Faltstrom et al, 2021                    |  |  |  |  |  |  |  |  |
| Grindem et al, 2016                      |  |  |  |  |  |  |  |  |
| King et al, 2021                         |  |  |  |  |  |  |  |  |
| Kyritsis et al, 2016                     |  |  |  |  |  |  |  |  |
| Nawasreh et al, 2016                     |  |  |  |  |  |  |  |  |
| Sousa et al, 2017                        |  |  |  |  |  |  |  |  |
| van Melick et al, 2021                   |  |  |  |  |  |  |  |  |
| Webster et al, 2019                      |  |  |  |  |  |  |  |  |
| Wellsandt et al, 2017                    |  |  |  |  |  |  |  |  |
| <b>Knee osteoarthritis</b>               |  |  |  |  |  |  |  |  |
| Filbay et al, 2021                       |  |  |  |  |  |  |  |  |
| Janssen et al, 2013                      |  |  |  |  |  |  |  |  |

|                        |  |  |  |  |  |  |  |  |
|------------------------|--|--|--|--|--|--|--|--|
| Patterson et al, 2018  |  |  |  |  |  |  |  |  |
| Pinczewski et al, 2007 |  |  |  |  |  |  |  |  |
| Wellsandt et al, 2018  |  |  |  |  |  |  |  |  |

**Studies not included in meta-analysis**

|                         |  |  |  |  |  |  |  |  |
|-------------------------|--|--|--|--|--|--|--|--|
| Flosadottir et al, 2016 |  |  |  |  |  |  |  |  |
| Flosadottir et al, 2018 |  |  |  |  |  |  |  |  |
| Kline et al, 2016       |  |  |  |  |  |  |  |  |

ACLR, anterior cruciate ligament reconstruction

Green (darker) shaded cells indicate where test was used within study
