# Supplementary material for: Unilateral tests of lower-limb function as prognostic indicators of future knee-related outcomes following anterior cruciate ligament injury: a systematic review and meta-analysis of 13 150 adolescents and adults
Source: HighWire-hosted journal article supplement (doi:10.1136/bjsports-2022-105736), 2023-01-20
Supplement: bjsports-2022-105736supp006_data_supplement.pdf [file bjsports-2022-105736supp006_data_supplement.pdf]

## Appendix 6. GRADE assessment for the single leg hop test applied to all outcomes\*

|                                                                                                                                                                                                                                                                | Study design     | Risk of bias                                                                                      | Inconsistency (I <sup>2</sup> )                                                                                                                                                                    | Indirectness                                                                                                    | Imprecision                             | Publication bias                                                                            | Odds Ratio                | GRADE    |
|----------------------------------------------------------------------------------------------------------------------------------------------------------------------------------------------------------------------------------------------------------------|------------------|---------------------------------------------------------------------------------------------------|----------------------------------------------------------------------------------------------------------------------------------------------------------------------------------------------------|-----------------------------------------------------------------------------------------------------------------|-----------------------------------------|---------------------------------------------------------------------------------------------|---------------------------|----------|
| <i>Return to Sport</i>                                                                                                                                                                                                                                         |                  |                                                                                                   |                                                                                                                                                                                                    |                                                                                                                 |                                         |                                                                                             |                           |          |
| Ardern et al, 2015<br>Ebert et al, 2019<br>Moksnes et al, 2009<br>Nawasreh et al, 2017<br>Toole et al, 2017<br>Faleide et al, 2021<br>Kitaguchi et al, 2020<br>Webster et al, 2019<br>Welling et al, 2020                                                      | (-2) Prospective | (-1) Serious: Most did not control for confounders, had inadequate sample size and poor follow-up | (-1) Not serious: I <sup>2</sup> = 70.6% (P= 0.001)<br>Overlapping confidence intervals from 8/10 studies.<br>Odds ratio between 0.94 to 16.44 without large discrepancies in weighting            | (0) Not serious<br>Similar populations, timepoints of testing and outcomes                                      | (0)<br>Total n= 638<br>CI (1.30, 3.54)  | N/A                                                                                         | (0)<br>1.97 (1.24, 3.13)  | Very low |
| <i>Patient-reported symptoms and function</i>                                                                                                                                                                                                                  |                  |                                                                                                   |                                                                                                                                                                                                    |                                                                                                                 |                                         |                                                                                             |                           |          |
| Cristiani et al, 2020<br>Culvenor et al, 2016<br>Ebert et al, 2019<br>Ericsson et al, 2013<br>Filbay et al, 2021<br>Logerstedt et al, 2012<br>Mansson et al, 2013<br>McGrath et al, 2017<br>Oiestad et al, 2012<br>Stropnik et al, 2020<br>Welling et al, 2020 | (-2) Prospective | (-1) Serious: Most did not control for confounders, had inadequate sample size and poor follow-up | (-1) Serious: I <sup>2</sup> = 69.2% (P= 0.001)<br>Overlapping confidence intervals of most studies with two outlying studies.<br>Odds ratio between 1.28 to 18.95.<br>Discrepancies in weighting. | (-1) Serious<br>Differing populations (age), differing timepoints of outcome, and outcomes used (IKDC and KOOS) | (0)<br>Total n=1737<br>CI (1.62, 3.88)  | (-1) Serious<br>P = 0.002<br>Eggers test for small study effects (as there were 10 studies) | (+1)<br>2.51 (1.62, 3.88) | Very low |
| <i>Success with ACL deficiency</i>                                                                                                                                                                                                                             |                  |                                                                                                   |                                                                                                                                                                                                    |                                                                                                                 |                                         |                                                                                             |                           |          |
| Button et al, 2006<br>Eitzen et al, 2010<br>Ekas et al, 2019<br>Ericsson et al, 2013<br>Fitzgerald et al, 2000<br>Grindem et al, 2018<br>Mosknes et al, 2009                                                                                                   | (-2) Prospective | (-1) Serious: Most did not control for confounders, had inadequate sample size and poor follow-up | (0) Not serious: I <sup>2</sup> = 54.1% (P= 0.042)<br>Overlapping confidence intervals from 5/7 studies.<br>Odds ratio between 0.59 to 6.65 without large discrepancies in weighting               | (-1) Serious<br>Differing outcome definitions                                                                   | (0)<br>Total n= 228<br>CI (0.75, 2.32)  | N/A                                                                                         | (0)<br>1.32 (0.75, 2.32)  | Very low |
| <i>Subsequent knee-injury after ACLR</i>                                                                                                                                                                                                                       |                  |                                                                                                   |                                                                                                                                                                                                    |                                                                                                                 |                                         |                                                                                             |                           |          |
| Cristiani et al, 2021<br>Falstrom et al, 2021<br>Grindem et al, 2016<br>King et al, 2021<br>Kyritsis et al, 2016<br>Webster et al, 2019<br>Wellstandt et al, 2017                                                                                              | (-2) Prospective | (-1) Serious: Most did not control for confounders, had inadequate sample size and poor follow-up | (0) Not serious: I <sup>2</sup> = 47.2% (P= 0.078)                                                                                                                                                 | (-1) Serious<br>Different outcome definition for knee-injury or re-injury                                       | (0)<br>Total n= 6970<br>CI (0.58, 1.11) | N/A                                                                                         | (0)<br>0.81 (0.58, 1.11)  | Very low |

| Knee Osteoarthritis                                                                                                    |                         |                                                                                                          |                                                           |                                                                                                        |                                                      |     |                                 |          |
|------------------------------------------------------------------------------------------------------------------------|-------------------------|----------------------------------------------------------------------------------------------------------|-----------------------------------------------------------|--------------------------------------------------------------------------------------------------------|------------------------------------------------------|-----|---------------------------------|----------|
| Filbay et al, 2021<br>Janssen et al, 2013<br>Patterson et al, 2018<br>Pinczewski et al, 2007<br>Wellstandt et al, 2018 | <b>(-2)</b> Prospective | <b>(-1) Serious:</b> Most did not control for confounders, had inadequate sample size and poor follow-up | <b>(-1) Serious:</b><br>I <sup>2</sup> = 75.8% (P= 0.006) | <b>(-1)</b><br>? maybe high due to timing of outcome (and therefore population) and outcome definition | <b>(-1)</b><br>Total n= 222<br>CI (0.70, 3.98)* wide | N/A | <b>(0)</b><br>1.67 (0.70, 3.98) | Very low |

Grade of evidence was assigned using the GRADE system, which has 4 categories HIGH, MODERATE, LOW or VERY LOW. Evidence is initially assigned as HIGH from randomised trials. The grade of evidence was then reduced if there was serious (-1) or very serious (-2) limitations to study quality or uncertainties about directness of association; important inconsistency (-1), imprecise or sparse data (-1) or a high probability of reporting bias (-1). Grade of evidence was increased if strong evidence of association was seen (e.g., RR >2 or <0.5) from ≥2 observational studies with no plausible confounders (+1) or very strong direct evidence (RR >5 or <0.2) with no major threats to validity (+2); if there was evidence of a dose-response gradient (+1) or if all plausible confounders would have reduced the effect/association seen (+1). The interpretation of GRADE evidence assessments is that for HIGH certainty evidence further research is very unlikely to change our confidence in the estimate of effect; for MODERATE certainty evidence further research is likely to have an important impact on our confidence in the estimate of effect and may change the estimate; for LOW certainty evidence further research is very likely to have an important impact on our confidence in the estimate of effect and is likely to change the estimate; and for VERY LOW certainty evidence any estimate of effect is very uncertain.

\*Only level of evidence of the single-forward hop test was assessed as this was used across all outcomes and studies. The level of evidence was found to be very low across all outcomes using this test and so we decided there was not need to complete this assessment for other tests as they would likely yield the same result and have less data from which to draw conclusions of evidence certainty.

KOOS, Knee osteoarthritis outcome score, IKDC, international knee documentation committee score
