# Supplementary material for: Unilateral tests of lower-limb function as prognostic indicators of future knee-related outcomes following anterior cruciate ligament injury: a systematic review and meta-analysis of 13 150 adolescents and adults
Source: HighWire-hosted journal article supplement (doi:10.1136/bjsports-2022-105736), 2023-01-20
Supplement: bjsports-2022-105736supp007_data_supplement.pdf [file bjsports-2022-105736supp007_data_supplement.pdf]

## Funnel plot with pseudo 95% confidence limits

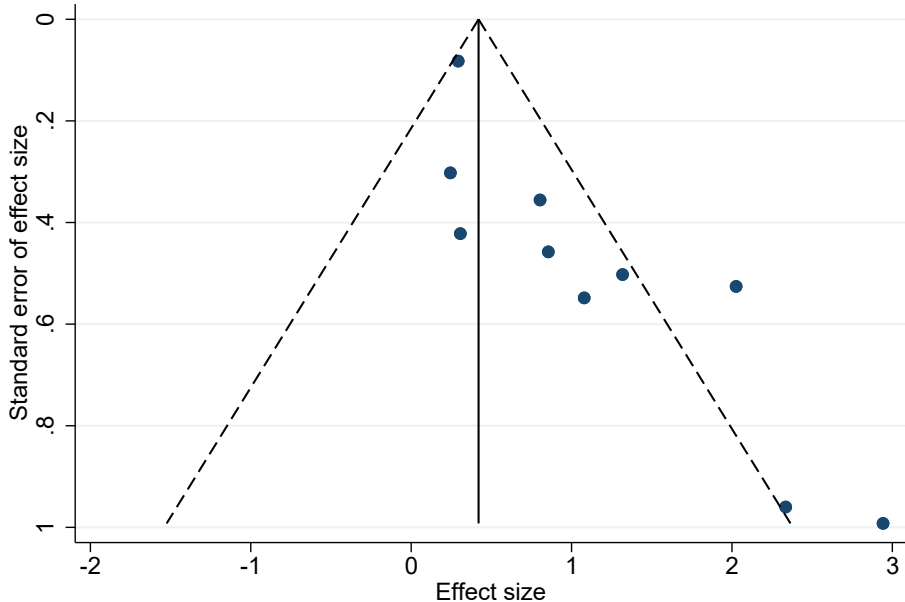

Number of studies = 10

Root MSE = 1.042

| Std_Eff | Coefficient | Std. err. | t    | P> t  | [95% conf. interval] |          |
|---------|-------------|-----------|------|-------|----------------------|----------|
| slope   | .095743     | .1061769  | 0.90 | 0.394 | -.1491014            | .3405874 |
| bias    | 2.014122    | .4626747  | 4.35 | 0.002 | .9471918             | 3.081052 |

Test of H0: no small-study effects

P = 0.002
