# Supplementary figures and images for: Unilateral tests of lower-limb function as prognostic indicators of future knee-related outcomes following anterior cruciate ligament injury: a systematic review and meta-analysis of 13 150 adolescents and adults
Source: HighWire-hosted journal article supplement (doi:10.1136/bjsports-2022-105736), 2023-01-20

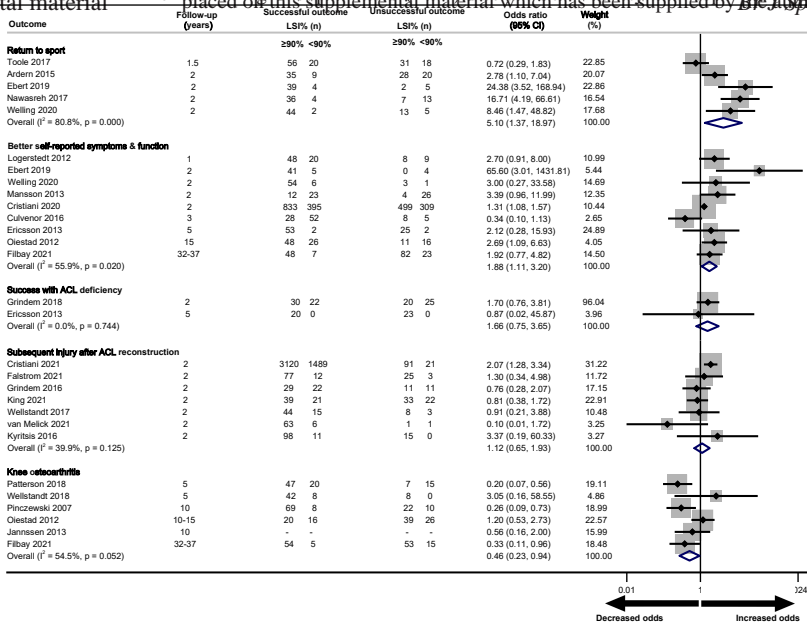

Supplement: bjsports-2022-105736supp011_data_supplement.pdf [file bjsports-2022-105736supp011_data_supplement.pdf]

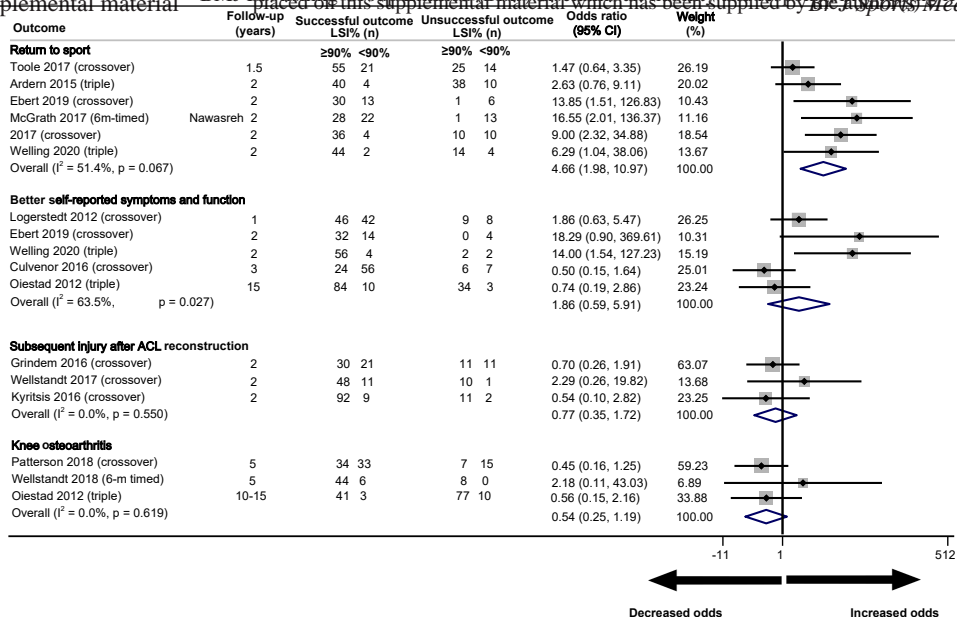

Supplement: bjsports-2022-105736supp012_data_supplement.pdf [file bjsports-2022-105736supp012_data_supplement.pdf]

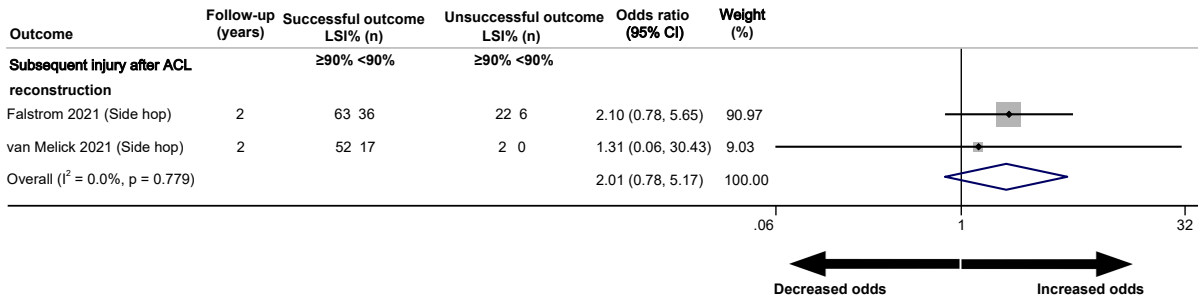

Supplement: bjsports-2022-105736supp013_data_supplement.pdf [file bjsports-2022-105736supp013_data_supplement.pdf]

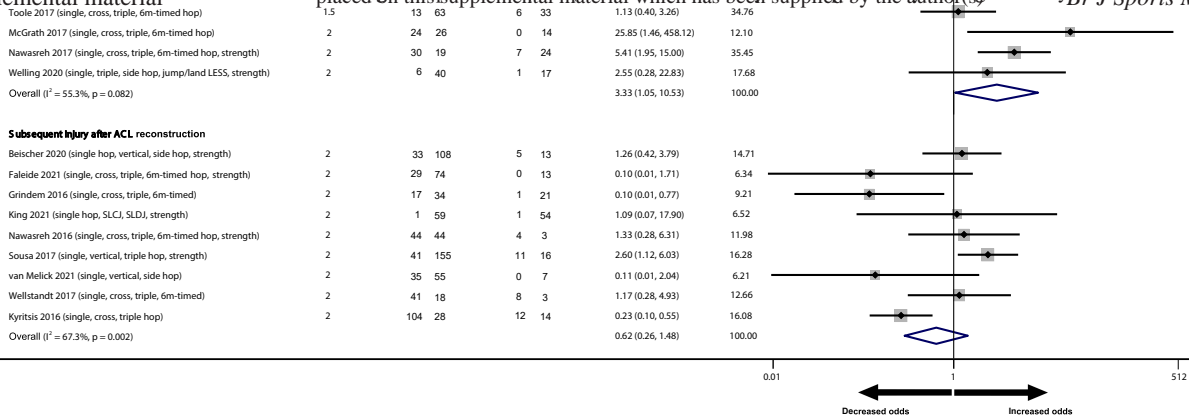

Supplement: bjsports-2022-105736supp014_data_supplement.pdf [file bjsports-2022-105736supp014_data_supplement.pdf]

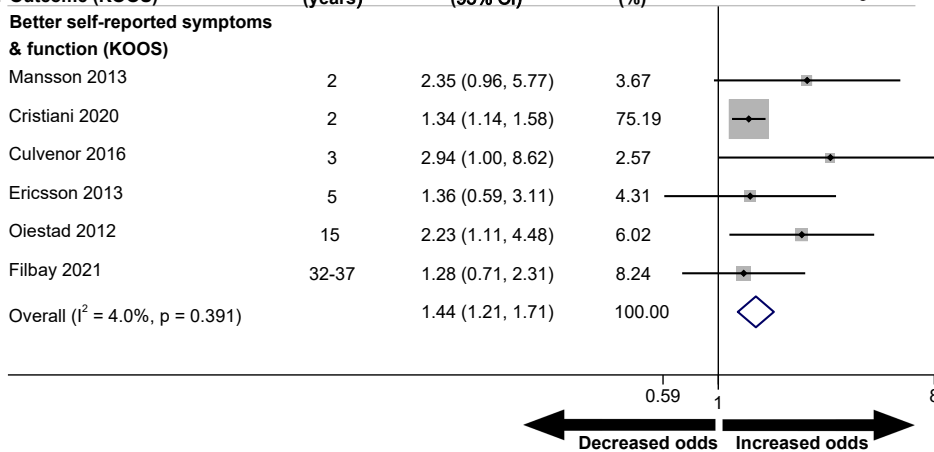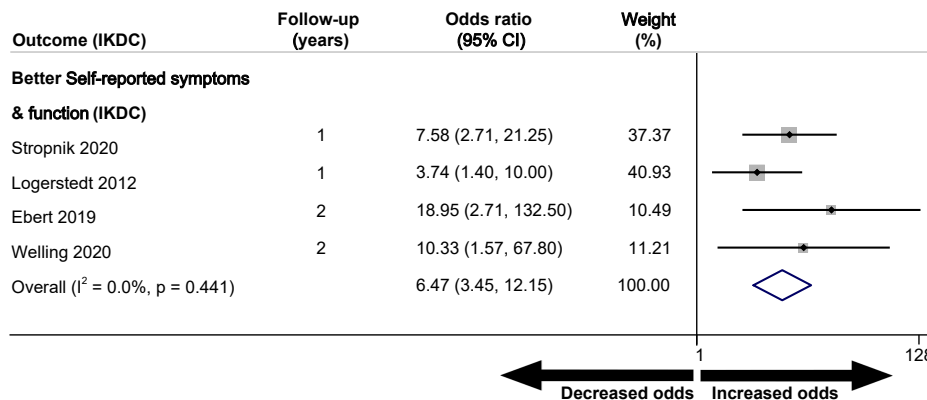

Supplement: bjsports-2022-105736supp008_data_supplement.pdf [file bjsports-2022-105736supp008_data_supplement.pdf]

**Better self-reported symptoms and function**

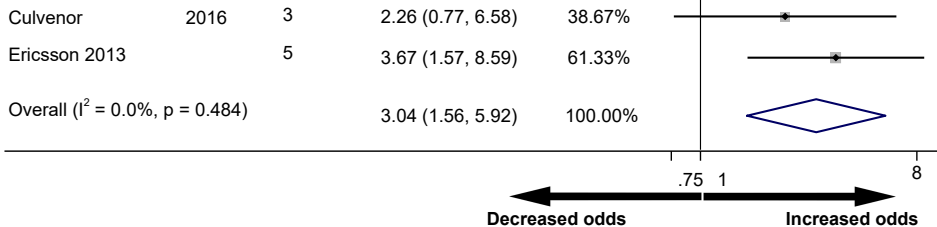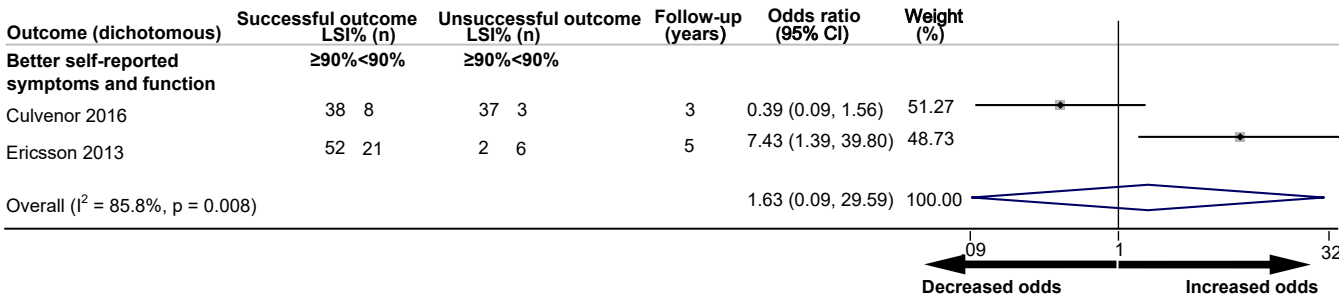

Supplement: bjsports-2022-105736supp009_data_supplement.pdf [file bjsports-2022-105736supp009_data_supplement.pdf]
